# Supplementary material
Source: HighWire-hosted journal article supplement (https://bmjopen.bmj.com/content/14/7/e085763)
Supplement: inline-supplementary-material-3 [file inline-supplementary-material-3.pdf]

**Table S3.** Major diagnostic categories of patients (n=10,968)

|                                                                         | Type 1 ICUs<br>(n=2,411) | Type 2 ICUs<br>(n=3,653) | HCUs<br>(n=4,904) | P value |
|-------------------------------------------------------------------------|--------------------------|--------------------------|-------------------|---------|
| Nervous system                                                          | 48 (2.0)                 | 71 (1.9)                 | 110 (2.2)         | <0.001  |
| Respiratory system                                                      | 180 (7.5)                | 300 (8.2)                | 459 (9.4)         |         |
| Circulatory system                                                      | 299 (12.4)               | 432 (11.8)               | 394 (8.0)         |         |
| Digestive system,<br>hepatobiliary system, and<br>pancreas              | 442 (18.3)               | 590 (16.2)               | 771 (15.7)        |         |
| Musculoskeletal system and<br>connective tissue                         | 41 (1.7)                 | 45 (1.2)                 | 49 (1.0)          |         |
| Skin and subcutaneous tissue                                            | 14 (0.6)                 | 15 (0.4)                 | 26 (0.5)          |         |
| Endocrine, nutritional, and<br>metabolic systems                        | 23 (1.0)                 | 20 (0.5)                 | 35 (0.7)          |         |
| Kidney, urinary tract, and male<br>reproductive system                  | 136 (5.6)                | 187 (5.1)                | 352 (7.2)         |         |
| Female reproductive system,<br>pregnancy, childbirth, and<br>puerperium | 19 (0.8)                 | 18 (0.5)                 | 18 (0.4)          |         |
| Blood, blood-forming organs,<br>and immunological disorders             | 140 (5.8)                | 332 (9.1)                | 424 (8.6)         |         |
| Others                                                                  | 1,069 (44.3)             | 1,643 (45.0)             | 2,266 (46.2)      |         |

Values are presented as frequency (percentage).  
ICU intensive care unit, HCU high care unit
